# Supplementary material for: The Mechanism of Enantioselective Neurosteroid Actions on GABAA Receptors
Source: MDPI journal article supplement (doi:10.3390/biom13020341), 2023-02-09
Supplement: s1 [file s1]

# Supplementary Materials

KK200

$\beta_3$  TM3 – <sup>280</sup>A I D M Y L M G C F V F V F L A I L L E Y  
[A F V L N Y I I F F] [G R]<sup>KK200</sup> [G P Q R]<sup>313</sup>

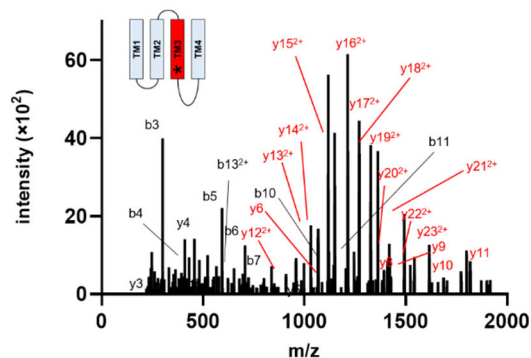

KK123

$\beta_3$  TM4 – <sup>426</sup>I V F P F T F S L F N L V Y W L Y<sup>KK123</sup> Y V N<sup>445</sup>

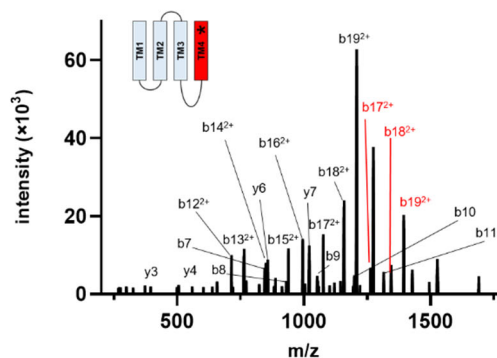

**Figure S1.** Fragmentation ion spectra identifying GABA<sub>A</sub> receptor residues photolabeled by KK200 and KK123. **Left.** HCD fragmentation spectrum of the  $\beta_3$ -subunit TM3 peptide photolabeled by 30  $\mu$ M KK200. Red and black indicate fragment ions that do or do not contain KK200, respectively. The schematic highlight in red identifies the TMD being analyzed and the asterisk denotes the approximate location of the KK200 labeled residue. **Right.** HCD fragmentation spectrum of the  $\beta_3$ -subunit TM4 peptide photolabeled by 30  $\mu$ M KK123. Red and black indicate fragment ions that do or do not contain KK123, respectively.

## $\beta_3$ subunit

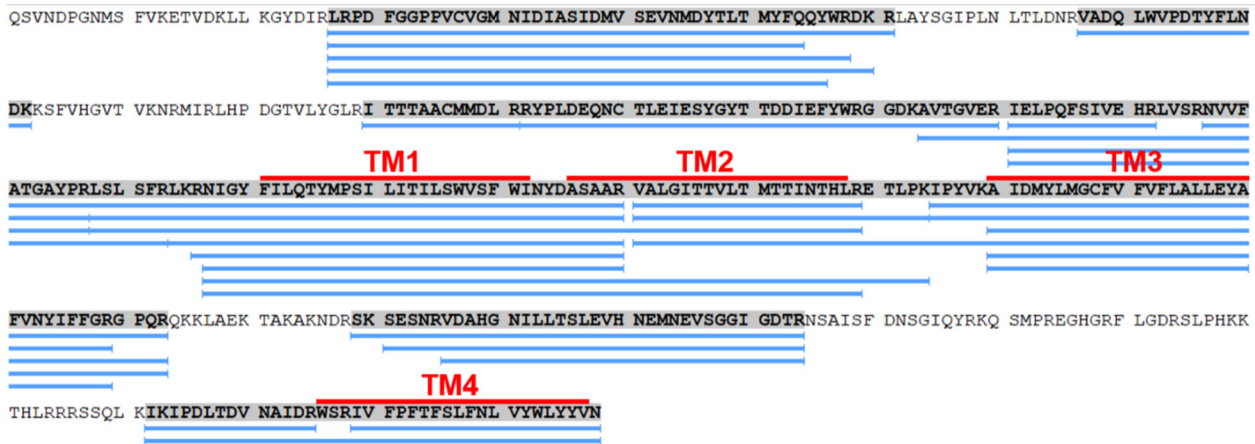

## $\alpha_1$ subunit

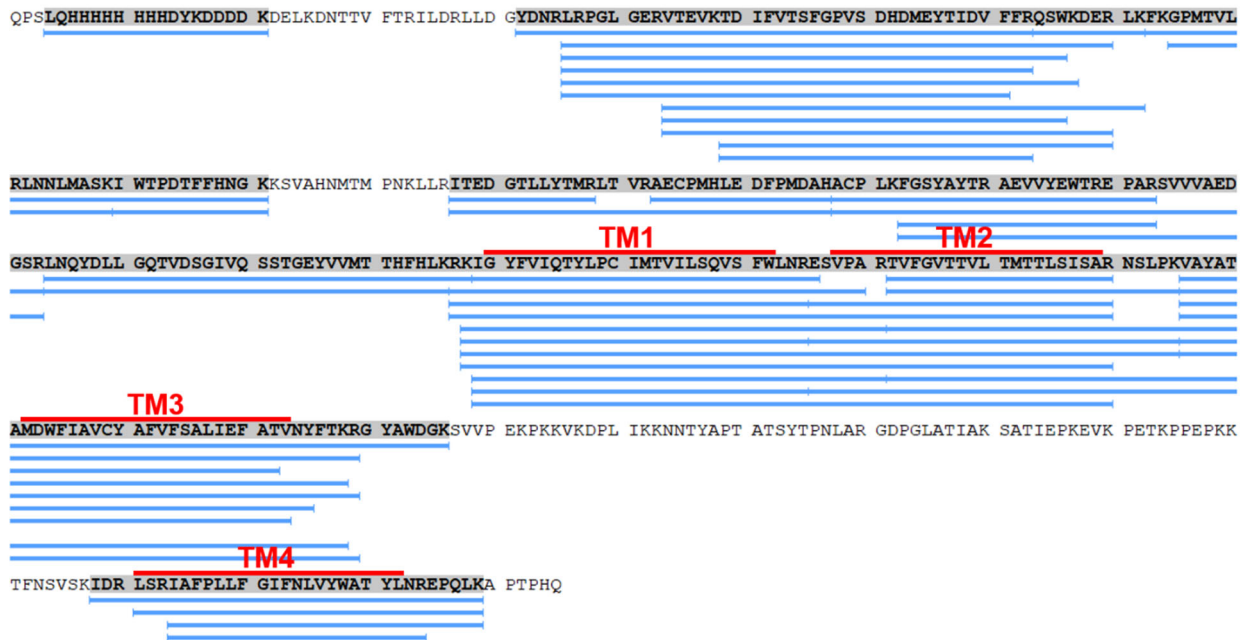

**Figure S2.** Mass spectrometric sequence coverage of  $\alpha_1$  and  $\beta_3$  subunits of the GABA<sub>A</sub> receptor based on analysis of HCD fragmentation ion spectra. Blue lines indicate identified peptides. Red lines indicate the transmembrane domains (TM1-4). 100% sequence coverage was obtained for the transmembrane domains of both the  $\alpha_1$  and  $\beta_3$  subunits. The digestion conditions and chromatographic separation are designed to detect the larger hydrophobic TM1-4 domains. Hydrophilic peptides and smaller tryptic peptides characteristic of the extracellular and intracellular domains are not reliably detected using this approach.
